# Supplementary material for: Two different mechanisms support selective attention at different phases of training
Source: PubMed Central journal article supplement (PMC5486967; doi:10.1371/journal.pbio.2001724), 2017-06-27
Supplement: pbio.2001724.s001.pdf [file pbio.2001724.s001.pdf]

| Data conditions<br>(day to day) | P1 with baseline subtraction   |                                |                  |
|---------------------------------|--------------------------------|--------------------------------|------------------|
|                                 | Gain model                     | Noise model                    | Nested model     |
|                                 | R <sup>2</sup> /baseline/noise | R <sup>2</sup> /baseline/noise | F value/ p value |
| 1st to 2nd                      | 0.885/0.363/0.169              | 0.897/0.363/0.185              | 0.936/0.362      |
| 1st to 3rd                      | 0.224/0.363/0.169              | 0.763/0.363/0.067 <sup>v</sup> | 33.347/<0.001*** |
| 1st to 4th                      | 0.559/0.363/0.169              | 0.749/0.363/0.123 <sup>v</sup> | 6.060/0.039*     |
| 1st to 5th                      | -2.003/0.363/0.169             | 0.261/0.363/0.005 <sup>v</sup> | 24.507/0.001***  |
| 1st to 6th                      | -0.135/0.363/0.169             | 0.772/0.363/0.067 <sup>v</sup> | 31.781/<0.001*** |
| 1st to 7th                      | 0.095/0.363/0.169              | 0.154/0.363/0.116 <sup>v</sup> | 0.556/0.477      |
| 1st to 8th                      | -0.282/0.363/0.169             | 0.750/0.363/0.065 <sup>v</sup> | 32.993/<0.001*** |
| 1st to 9th                      | -1.255/0.363/0.169             | 0.460/0.363/0.023 <sup>v</sup> | 25.394/0.001***  |
| 1st to 10th                     | -0.431/0.363/0.169             | 0.720/0.363/0.053 <sup>v</sup> | 32.893/<0.001*** |
