# Supplementary material for: Two different mechanisms support selective attention at different phases of training
Source: PubMed Central journal article supplement (PMC5486967; doi:10.1371/journal.pbio.2001724), 2017-06-27
Supplement: pbio.2001724.s002.pdf [file pbio.2001724.s002.pdf]

| Data conditions<br>(day to day) | P1 without baseline subtraction |                                 |                  |
|---------------------------------|---------------------------------|---------------------------------|------------------|
|                                 | Gain model                      | Noise model                     | Nested model     |
|                                 | R <sup>2</sup> /baseline/noise  | R <sup>2</sup> /baseline/noise  | F value/ p value |
| 1st to 2nd                      | 0.864/-0.510/0.169              | 0.898/-0.510/0.195              | 2.678/0.140      |
| 1st to 3rd                      | 0.508/-0.510/0.169              | 0.899/-0.510/0.105 <sup>v</sup> | 31.119/<0.001*** |
| 1st to 4th                      | 0.604/-0.510/0.169              | 0.742/-0.510/0.130 <sup>v</sup> | 4.236/0.074      |
| 1st to 5th                      | 0.872/-0.510/0.169              | 0.893/-0.510/0.153 <sup>v</sup> | 1.564/0.246      |
| 1st to 6th                      | 0.752/-0.510/0.169              | 0.936/-0.510/0.123 <sup>v</sup> | 21.781/0.002**   |
| 1st to 7th                      | 0.080/-0.510/0.169              | 0.280/-0.510/0.123 <sup>v</sup> | 2.220/0.175      |
| 1st to 8th                      | 0.375/-0.510/0.169              | 0.789/-0.510/0.103 <sup>v</sup> | 15.676/0.004**   |
| 1st to 9th                      | 0.700/-0.510/0.169              | 0.874/-0.510/0.123 <sup>v</sup> | 11.115/0.010**   |
| 1st to 10th                     | 0.467/-0.510/0.169              | 0.886/-0.510/0.099 <sup>v</sup> | 29.444/<0.001*** |
